# Supplementary material for: The Fischer–Tropsch synthesis performance over cobalt supported on silicon-based materials: the effect of thermal conductivity of the support
Source: Royal Society of Chemistry journal article supplement (doi:10.1039/c9cy00578a), 2019-01-01
Supplement: c9cy00578a1.pdf [file c9cy00578a1.pdf]

Supplementary Material

**The Fischer-Tropsch synthesis performance over cobalt supported on silicon-based materials: the effect of thermal conductivity of support**

*Min Zhong,<sup>a,b</sup> Yuanyuan Guo,<sup>a,b</sup> Jungang Wang,<sup>a</sup> Zhancheng Ma,<sup>a</sup> Ming Xia,<sup>a</sup> Congbiao Chen,<sup>a</sup> Litao Jia,<sup>a, c\*</sup> Bo Hou<sup>a</sup> and Debao Li<sup>a, c</sup>*

*<sup>a</sup> State Key Laboratory of Coal Conversion, Institute of Coal Chemistry, Chinese Academy of Sciences, Taiyuan 030001, Shanxi, PR China*

*<sup>b</sup> University of Chinese Academy of Sciences, Beijing 100049, PR China*

*<sup>c</sup> Dalian National Laboratory for Clean Energy, Dalian, 116023, China*

**\* To whom all correspondence should be addressed**

E-mail: [jialitao910@163.com](mailto:jialitao910@163.com) (Litao Jia)

Fax: (+86) 0351-4041153; Tel: (+86) 0351-4121877

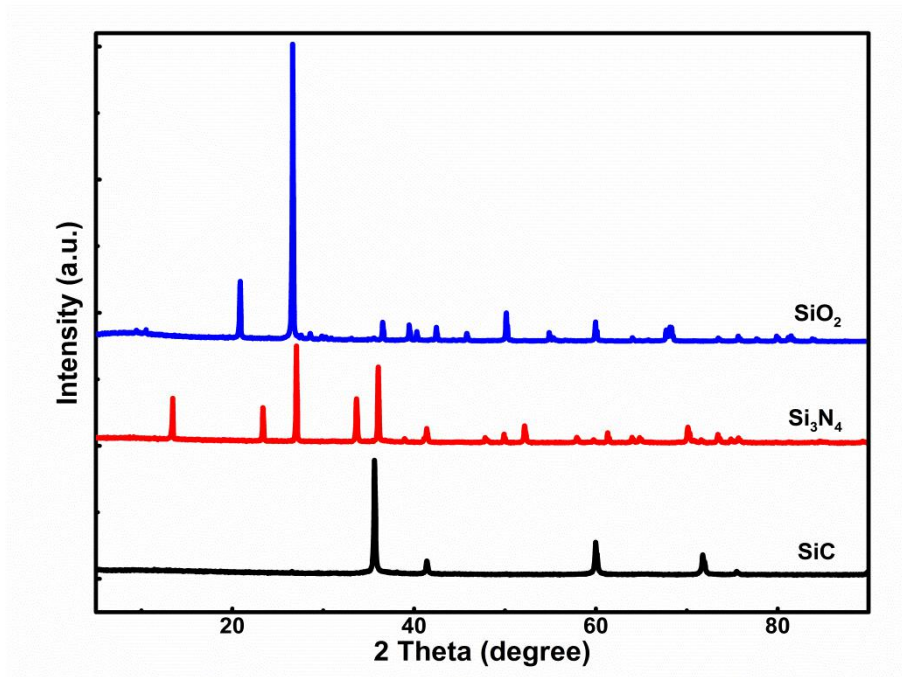

Fig. S1 The XRD pattern of support materials

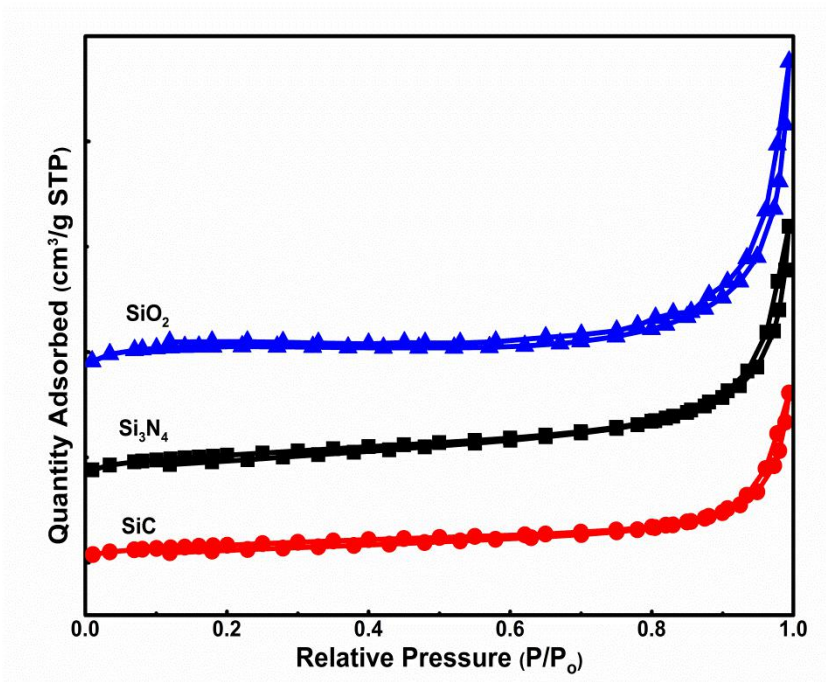

Fig. S2 The N<sub>2</sub>-adsorption/desorption isotherms of the supports

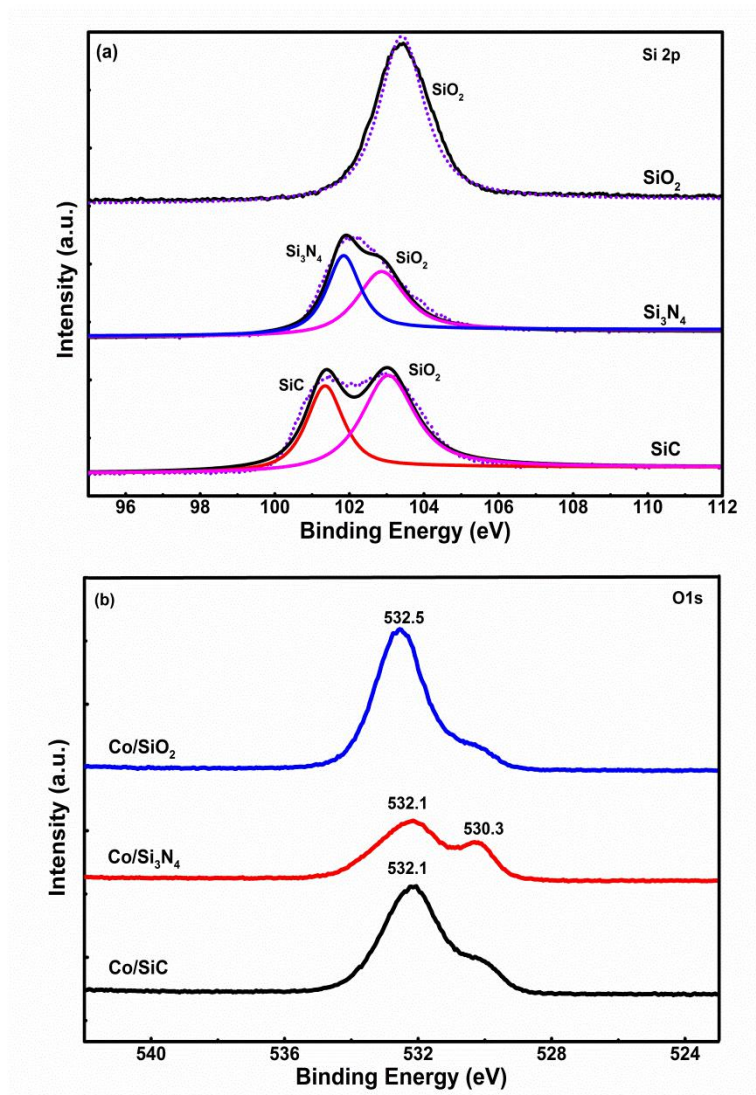

Fig. S3 The XPS spectra: a) Si 2p; b) O 1s

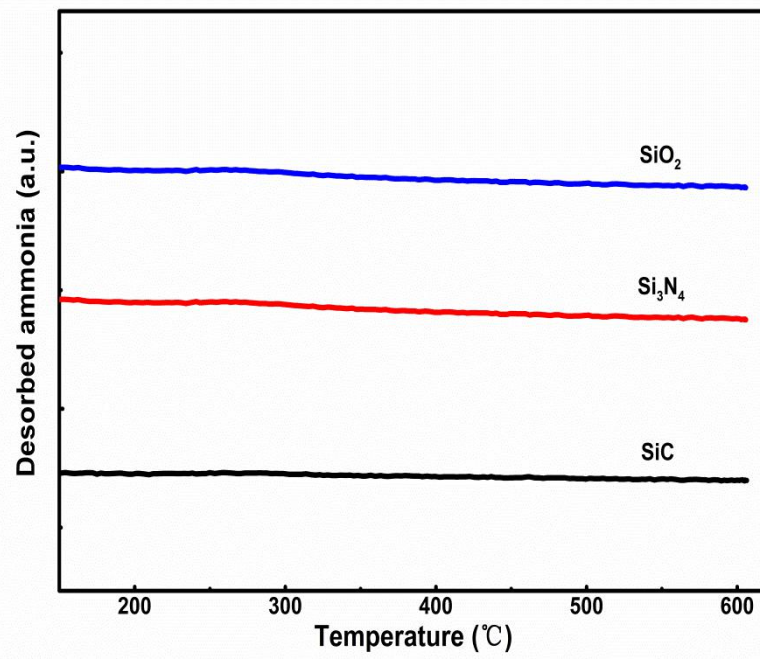

**Fig. S4** The NH<sub>3</sub>-TPD spectrum of supports

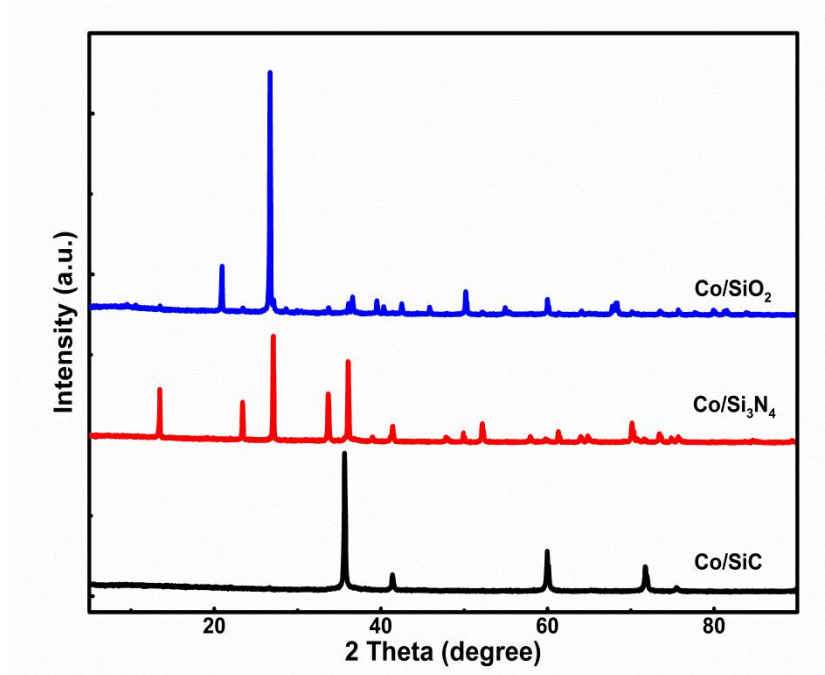

Fig. S5 The XRD pattern of calcined catalysts

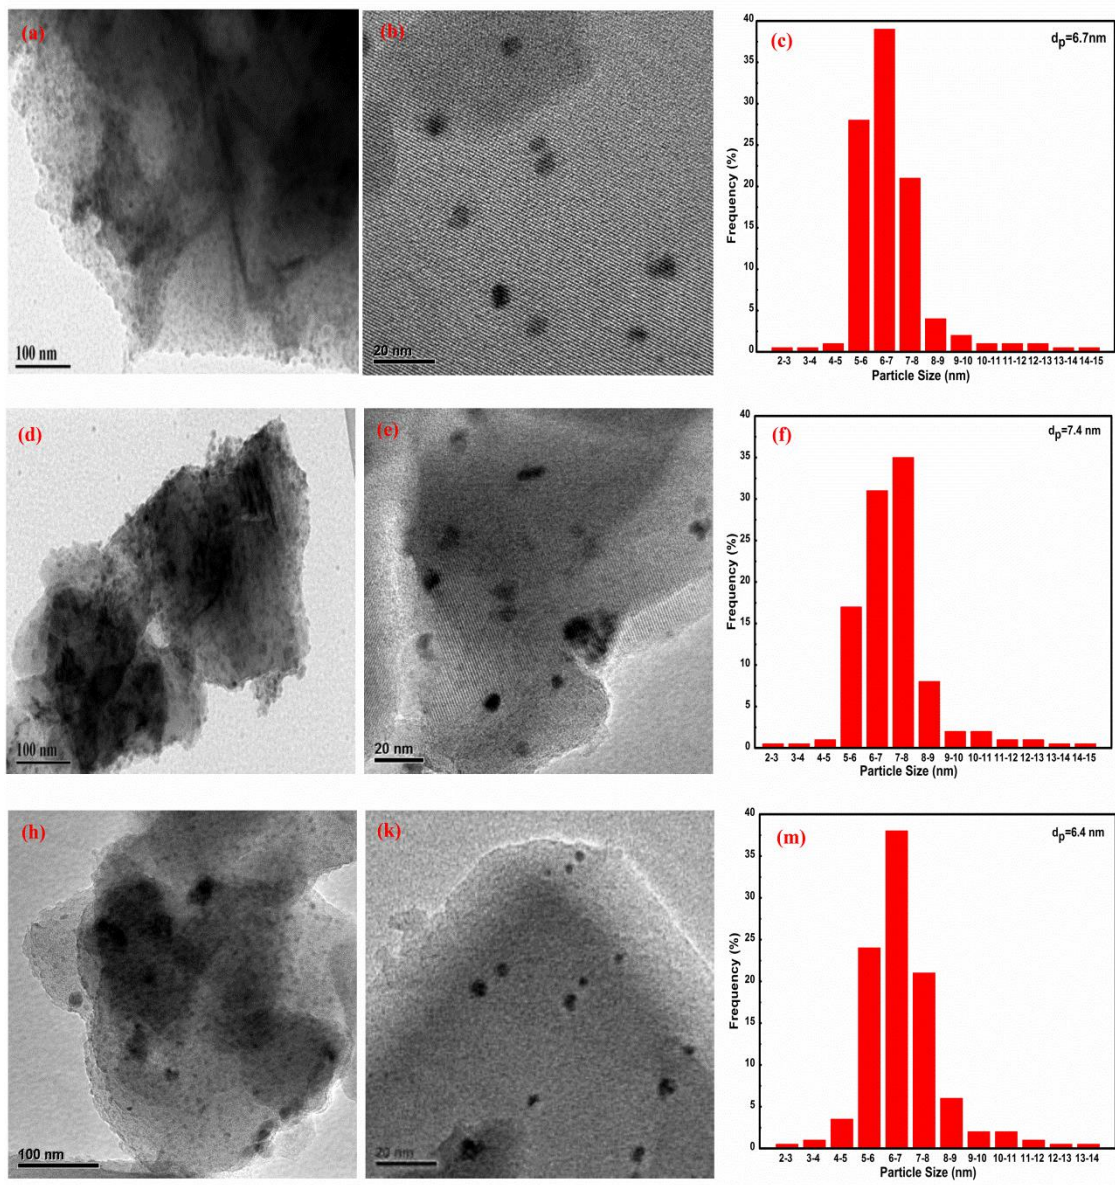

**Fig. S6** The TEM images of fresh catalysts and the histogram of  $\text{Co}_3\text{O}_4$  particle size

distribution: a, b, c) Co/SiC; d, e, f) Co/Si<sub>3</sub>N<sub>4</sub>; h, k, m) Co/SiO<sub>2</sub>

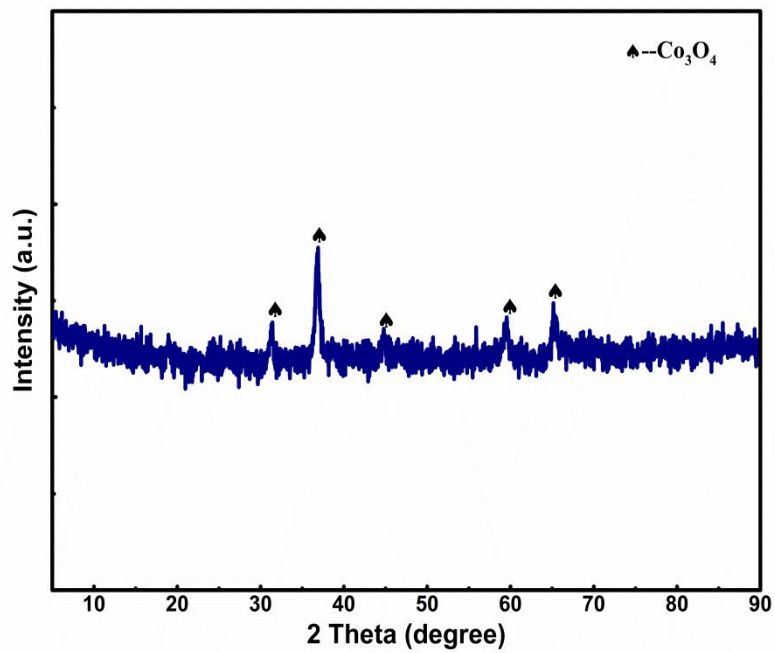

**Fig. S7** The XRD pattern of pure cobalt oxide sample

In order to confirm the phase of cobalt oxide in all catalysts, the pure cobalt oxide obtained by the thermal decomposition of cobalt(II) acetylacetonate, and the preparation method was same as the catalyst preparation. As shown in **Fig. S7**, the XRD result manifested that spinel  $\text{Co}_3\text{O}_4$  was predominant cobalt species in all calcined catalysts.



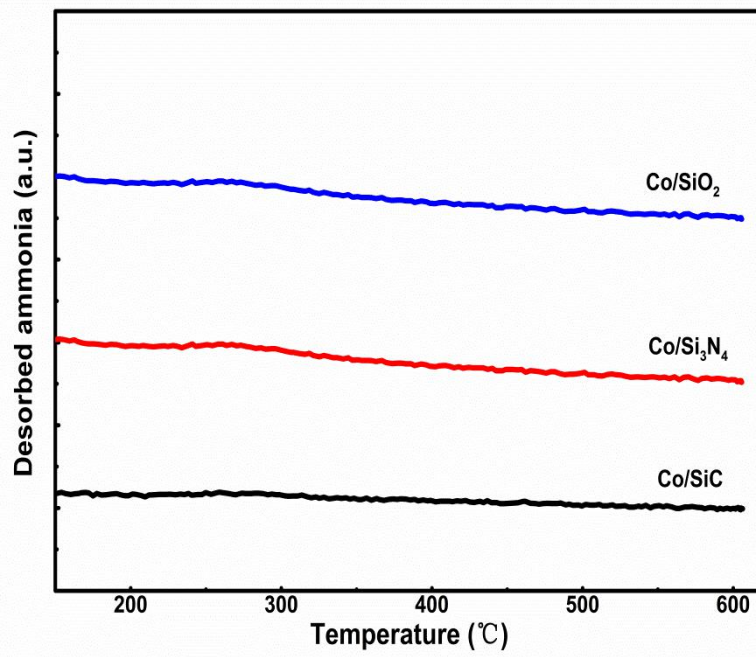

**Fig. S8** The NH<sub>3</sub>-TPD spectrum of catalyst samples

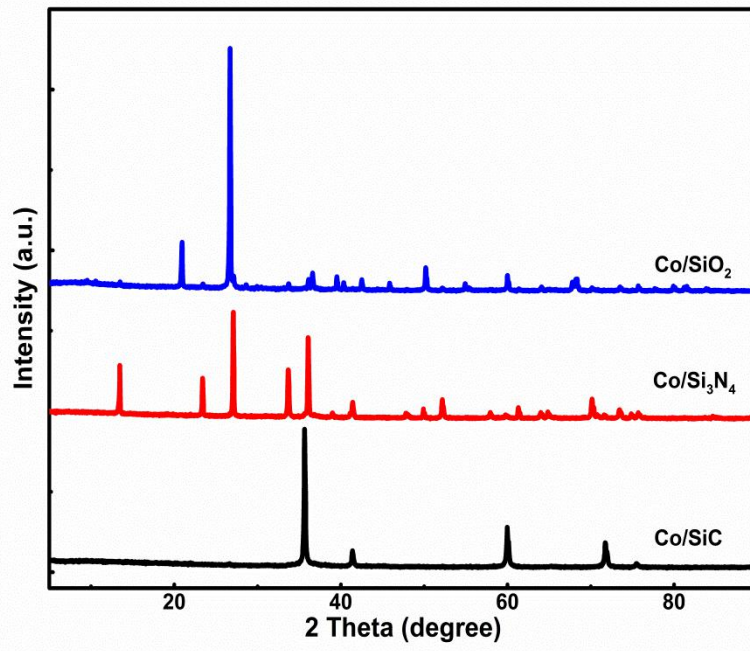

**Fig. S9** The XRD pattern of reduced catalyst samples

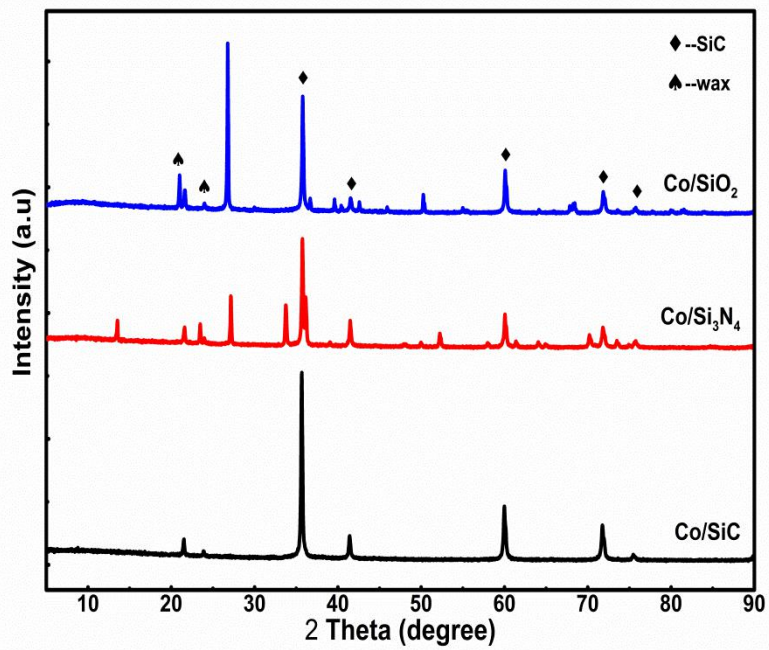

**Fig. S10** The XRD pattern of spent catalysts

As seen in **Fig. S10**, no diffraction peak which attributed to cobalt species was observed in the spent catalyst samples beside those belonged to supports, diluent (SiC) and wax.

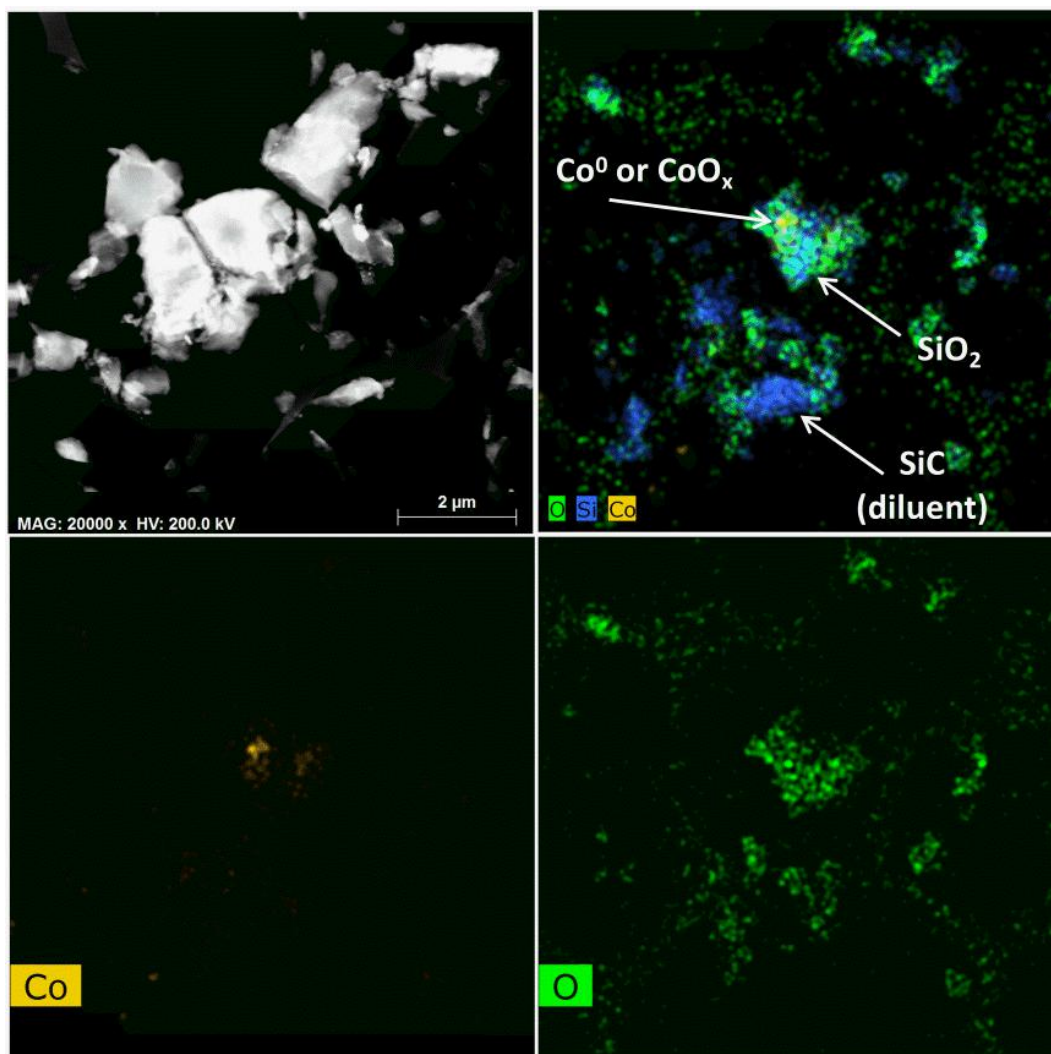

**Fig. S11** The elemental mapping of the spent catalysts (such as Co/SiO<sub>2</sub> catalyst)

As shown in Fig. S11, the elemental mapping of spent catalysts (e.g., Co/SiO<sub>2</sub> sample) showed that a certain amount of SiC diluent could remain in the spent catalysts after the separation treatment. In addition, the cobalt phase could not migrate to the SiC diluent during the thermal activation and reaction process.

**Table S1** The XPS data of catalysts

| Catalyst sample                   | BE (Co 2p <sub>3/2</sub> ) | BE (Co 2p <sub>1/2</sub> ) | $\Delta$ BE |
|-----------------------------------|----------------------------|----------------------------|-------------|
| Co/SiC                            | 780.7                      | 796.3                      | 15.6        |
| Co/Si <sub>3</sub> N <sub>4</sub> | 780.5                      | 795.9                      | 15.4        |
| Co/SiO <sub>2</sub>               | 780.7                      | 796.1                      | 15.4        |
